# Supplementary material for: Drug-induced senescence by aurora kinase inhibitors attenuates innate immune response of macrophages on gastric cancer organoids
Source: PubMed Central journal article supplement — Cancer Lett. 2024 Aug 28;598:217106. doi: 10.1016/j.canlet.2024.217106 (PMC11364160; doi:10.1016/j.canlet.2024.217106), 2024-08-28
Supplement: mmc1.pdf [file mmc1.pdf]

Supplementary figures

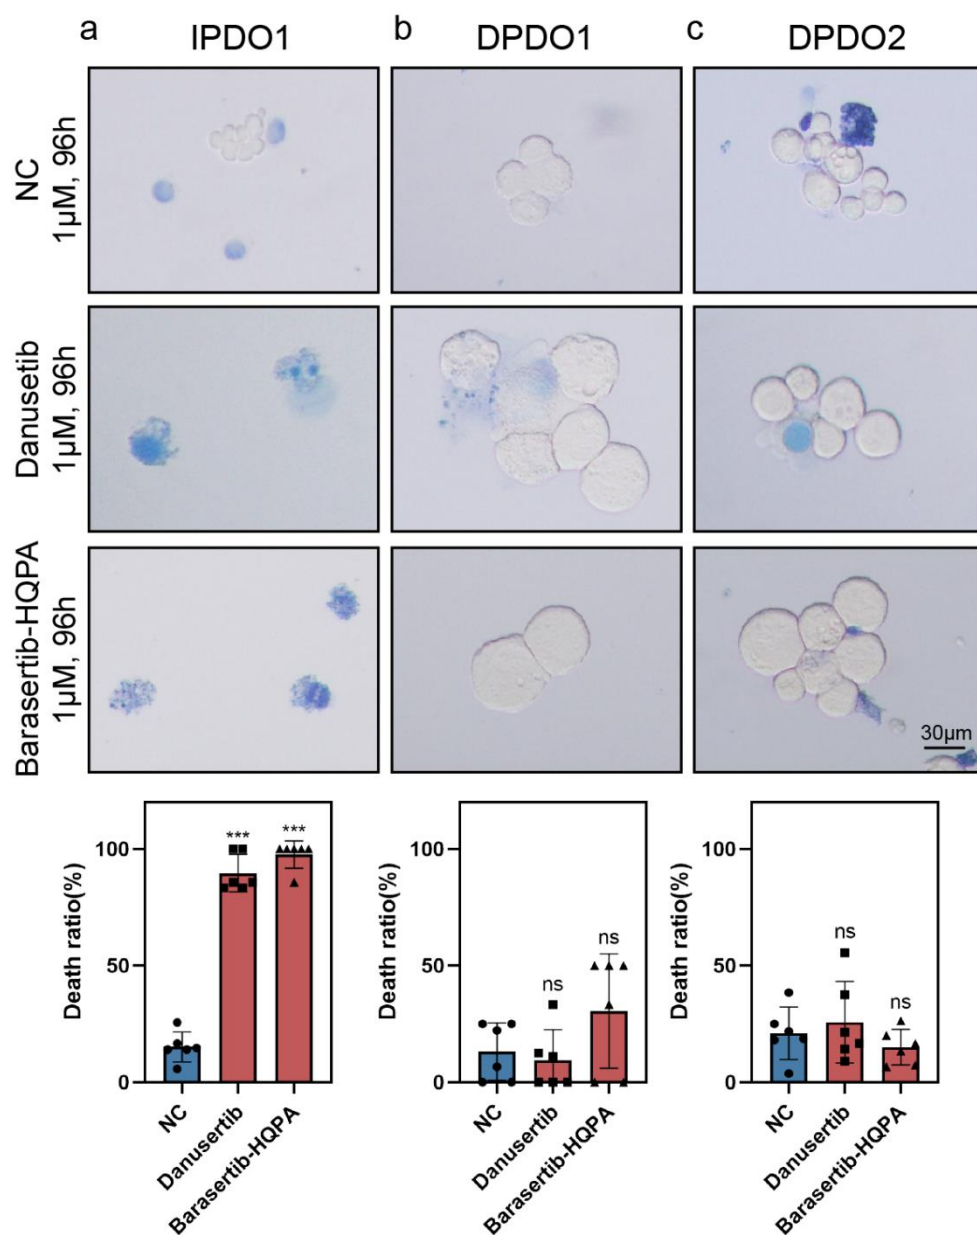

**Figure S1. Analysis of cell death ratio for IPDOs and DPDOs upon AURKi treatment by trypan blue staining. (a)** The cell death ratio is increased in IPDO1 after AURKi treatment. The death cells are stained blue, and the living cells are smooth and translucent. **(b)** There is no obvious cell death in DPDO1 after AURKi treatment. **(c)** There is no obvious cell death in DPDO2 after AURKi treatment. “\*”, compared with NC group. NS. No significance; \*\*\*  $P < 0.001$ .

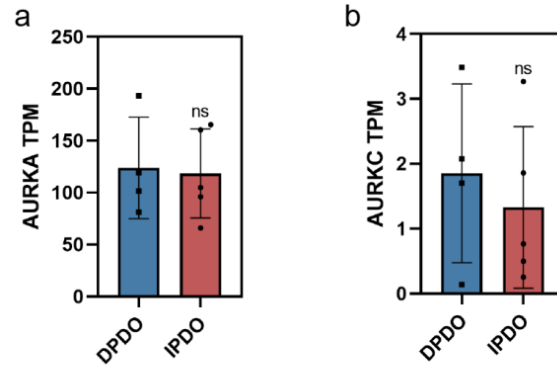

**Figure S2. The transcriptomic levels of AURKA and AURKC genes.** (a) There is no significant difference of AURKA levels between DPDOs and IPDOs ( $^{ns}P = 0.87$ ). (b) There is no significant difference of AURKC levels between DPDOs and IPDOs ( $^{ns}P = 0.57$ ).

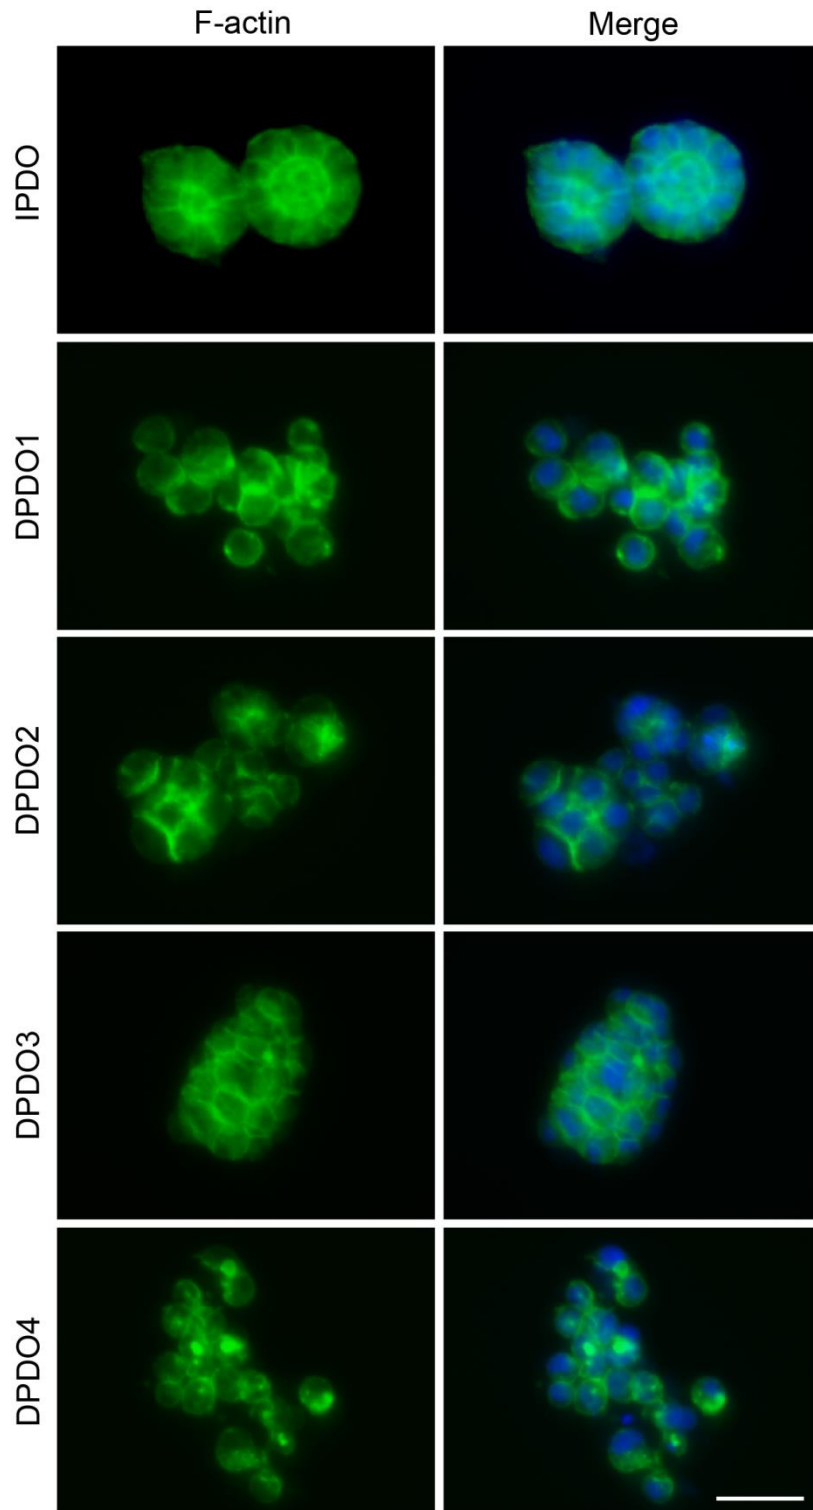

**Figure S3.** The distribution difference of cytoskeleton F-actin (green) in IPDO and DPDO. The arrangement of F-actin in IPDO shows the top-bottom orientation, while the arrangement of F-actin in DPDOs shows no top-bottom orientation. The nuclei are stained by Hoechst (blue). Scale bar = 50  $\mu\text{m}$
